# Supplementary material for: The FBXO32/ATR/ATM axis acts as a molecular switch to control the sensitivity of osteosarcoma cells to irradiation through its regulation of EXO1 expression: FBXO32/ATR/ATM/EXO1 axis induces OS cells to anti-radiotherapy
Source: PubMed Central journal article supplement — Acta Biochim Biophys Sin (Shanghai). 2023 May 24;55(5):842–52. doi: 10.3724/abbs.2023049 (PMC10281878; doi:10.3724/abbs.2023049), 2023-05-24
Supplement: 522TableS1-S2-230506.pdf [file 522TableS1-S2-230506.pdf]

**Supplementary Table S1. Sequences of the shRNAs used in this study**

| Gene          | Target sequence (5'→3') |
|---------------|-------------------------|
| EXO1-shRNA1   | TGCAGACTGCTGCAAAGCTTT   |
| EXO1-shRNA2   | AACAAGGTTCTGGGCTATA     |
| ATM-shRNA1    | CCTTTCATTCAGCCTTTAGAA   |
| ATM-shRNA2    | TGATGGTCTTAAGGAACATCT   |
| ATR-shRNA     | CTGTGGTTGTATCTGTTCAAT   |
| FBXO32-shRNA1 | CCAAGGAAAGAGCAGTATGGA   |
| FBXO32-shRNA2 | GATACCCTTCAGCTCTGCAA    |
| Control shRNA | ACGUGACACGUUCGGAGAATT   |

**Supplementary Table S2. Sequences of the primers used in this study**

| Gene          | Primer sequence (5'→3')           |
|---------------|-----------------------------------|
| <i>EXO1</i>   | Forward, TGAGGAAGTATAAAGGGCAGGT   |
|               | Reverse, AGTTTTTCAGCACAAAGCAATAGC |
| <i>ATM</i>    | Forward, ATCTGCTGCCGTCAACTAGAA    |
|               | Reverse, GATCTCGAATCAGGCGCTTAAA   |
| <i>ATR</i>    | Forward, GATTGCAGCAACTCCCTCCT     |
|               | Reverse, TCCACAGCATGACCCATCAC     |
| <i>FBXO32</i> | Forward, TGAGCGACCTCAGCAGTTAC     |
|               | Reverse, TGCAATATCCATGGCGCTCT     |
| <i>NBS1</i>   | Forward, CCGGCAGGAGGAGAACCA       |
|               | Reverse, CGGGAAAAGCCATTCTGCAT     |
| <i>BRCA1</i>  | Forward, TGATGCCAGCTTCGTGACTT     |
|               | Reverse, ATCAAAGGCCACTGTGGAGG     |
| <i>Actin</i>  | Forward, GTCACCAACTGGGACGACAT     |
|               | Reverse, TAGCAACGTACATGGCTGGG     |
